# Supplementary material for: Structures of a Phosphoryl Derivative of 4-Allyl-2,4-dihydro-3H-1,2,4-triazole-3-thione: An Illustrative Example of Conformational Polymorphism
Source: MDPI journal article supplement (doi:10.3390/cryst11091126), 2021-09-15
Supplement: s1 [file s1]

## Supporting info for:

# Structures of a phosphoryl derivative of 4-allyl-2,4-dihydro-3H-1,2,4-triazole-3-thione: an illustrative example of conformational polymorphism

Ivan V. Fedyanin<sup>a</sup>, Aida I. Samigullina<sup>a,b</sup>, Ivan A. Krutov<sup>c</sup>, Elena L. Gavrilova<sup>c</sup>,  
Dmitry V. Zakharychev<sup>b</sup>

<sup>a</sup> A. N. Nesmeyanov Institute of Organoelement Compounds, Russian Academy of Sciences, Vavilova st. 28,  
119991 Moscow, Russian Federation.

<sup>b</sup> A. E. Arbuzov Institute of Organic and Physical Chemistry, FRC Kazan Scientific Center, Russian Academy of  
Sciences, 8 Arbuzov Street, Kazan 420088, Russian Federation

<sup>c</sup> Kazan National Research Technological University, ul. K. Marksa 68, Kazan, Tatarstan, 420015 Russia

E-mail: [octy@xrlab.ineos.ac.ru](mailto:octy@xrlab.ineos.ac.ru)

## Table of Contents

|                                                                |    |
|----------------------------------------------------------------|----|
| 1 Powder diffraction.....                                      | 2  |
| 2 Molecular geometry.....                                      | 4  |
| 2.1 Molecular projections along rotatable bonds.....           | 4  |
| 2.2 Intramolecular bonding interactions.....                   | 6  |
| 3 DFT calculations (PBE0-D3/POB-TZVP-rev2).....                | 7  |
| 3.1 General information.....                                   | 7  |
| 3.2 Calculated energies.....                                   | 7  |
| 3.3 Atomic coordinates of the DFT-optimized structures.....    | 8  |
| 3.4 Lowest energy conformer found by an exhaustive search..... | 12 |
| 4 Bonding interactions.....                                    | 13 |
| 4.1 Intermolecular bonding interactions.....                   | 13 |
| 4.2 Connectivity graphs of H-bonded synthons.....              | 15 |
| 5 Hirshfeld fingerprint plots.....                             | 16 |

# 1 Powder diffraction

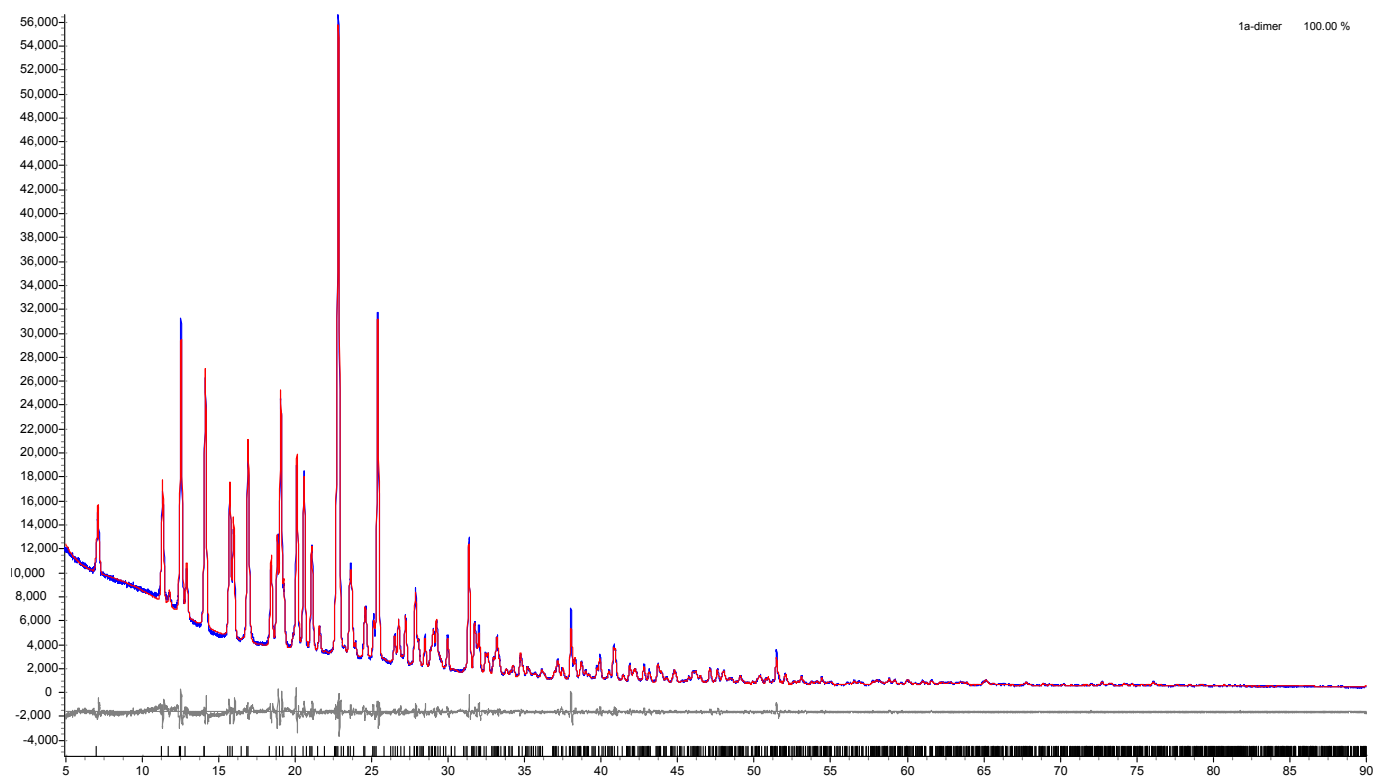

Figure S1. Experimental X-ray diffraction pattern (blue), Pawley fit (red), and difference profile (gray) for **1a** ( $R_{wp} = 0.046$ ).

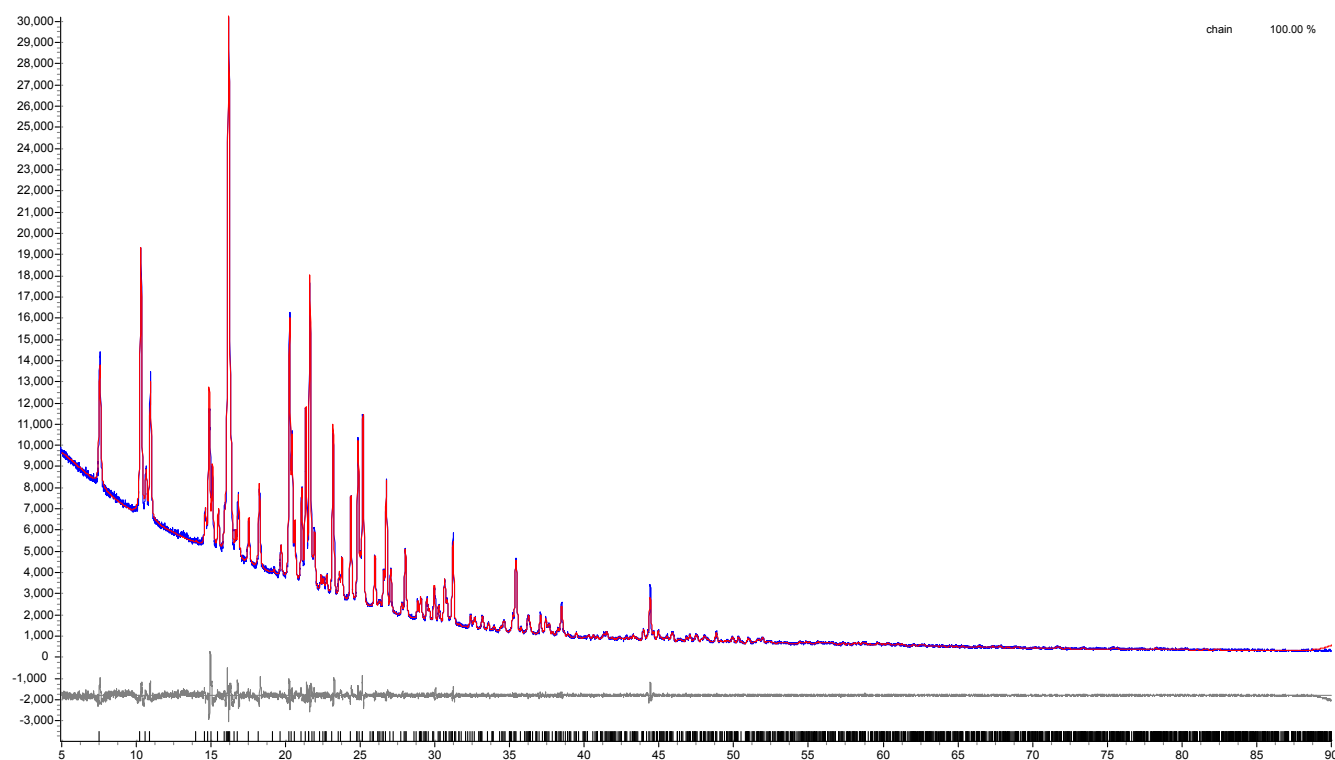

Figure S2. Experimental X-ray diffraction pattern (blue), Pawley fit (red), and difference profile (gray) for **1b** ( $R_{wp} = 0.037$ ).

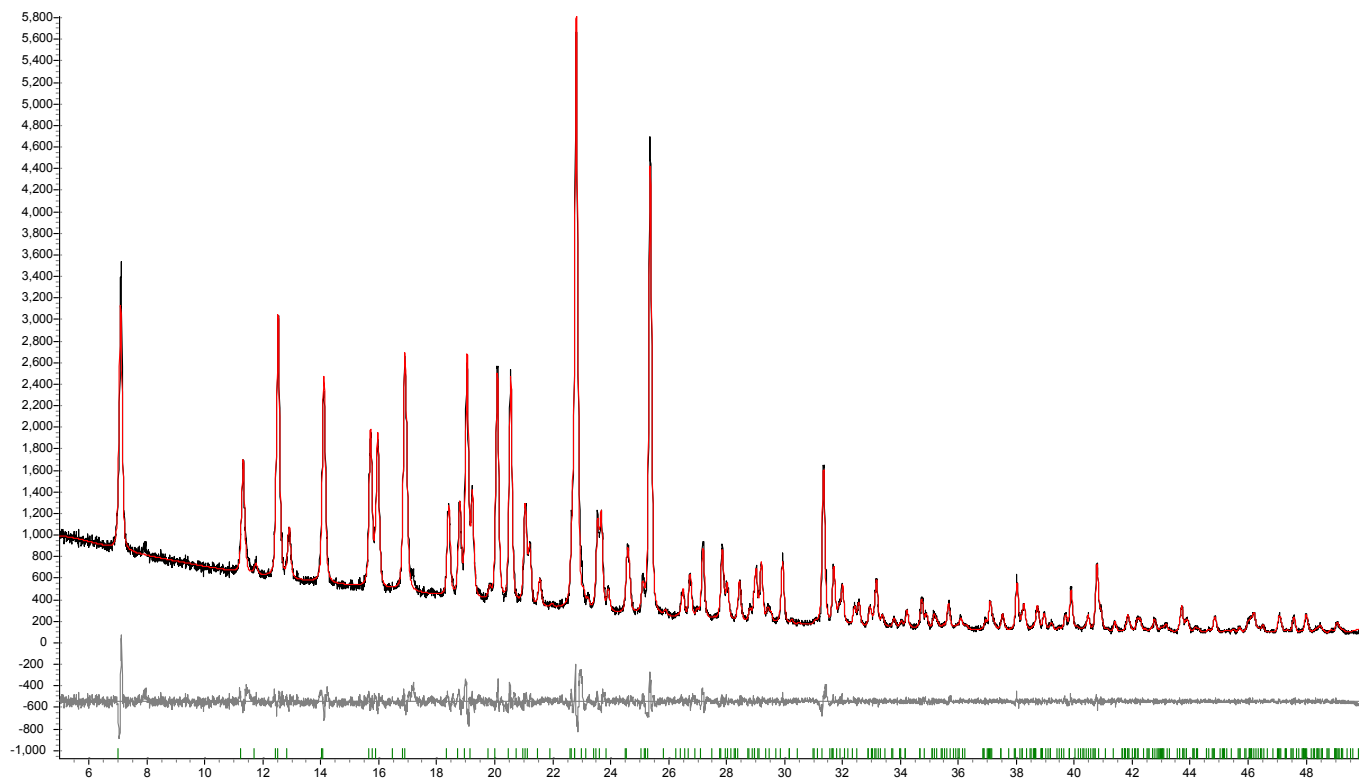

Figure S3. Experimental X-ray diffraction pattern (blue), Pawley fit (red), and difference profile (gray) for the sample **1a** heated to 170°C and cooled back to ambient conditions ( $R_{wp} = 0.063$ ). The phase is the same as of the source sample. The small peak at ca. 7.6 deg. belongs to an unidentified admixture or phase.

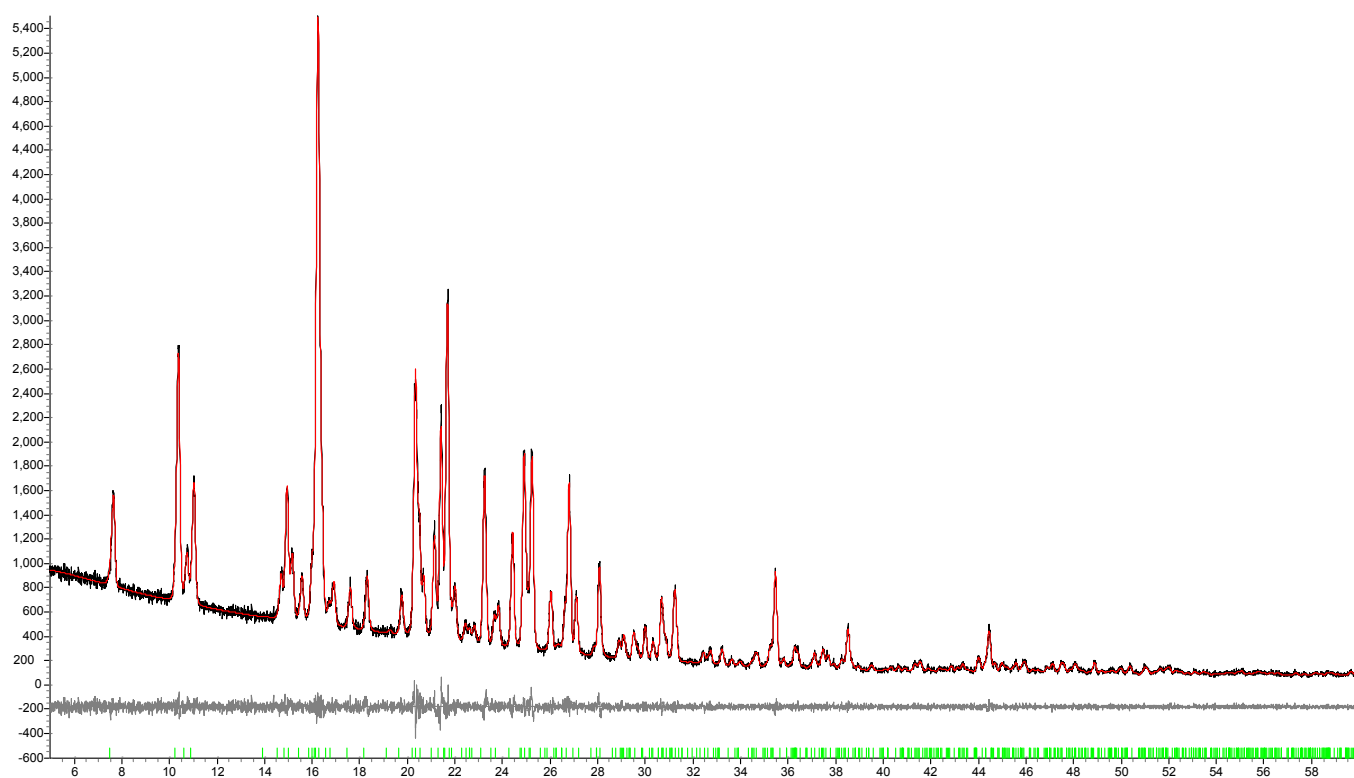

Figure S4. Experimental X-ray diffraction pattern (blue), Pawley fit (red), and difference profile (gray) for the sample **1a** heated to 200°C and cooled back to ambient conditions ( $R_{wp} = 0.051$ ). The irreversible phase transition to **1b** was observed.

## 2 Molecular geometry

### 2.1 Molecular projections along rotatable bonds

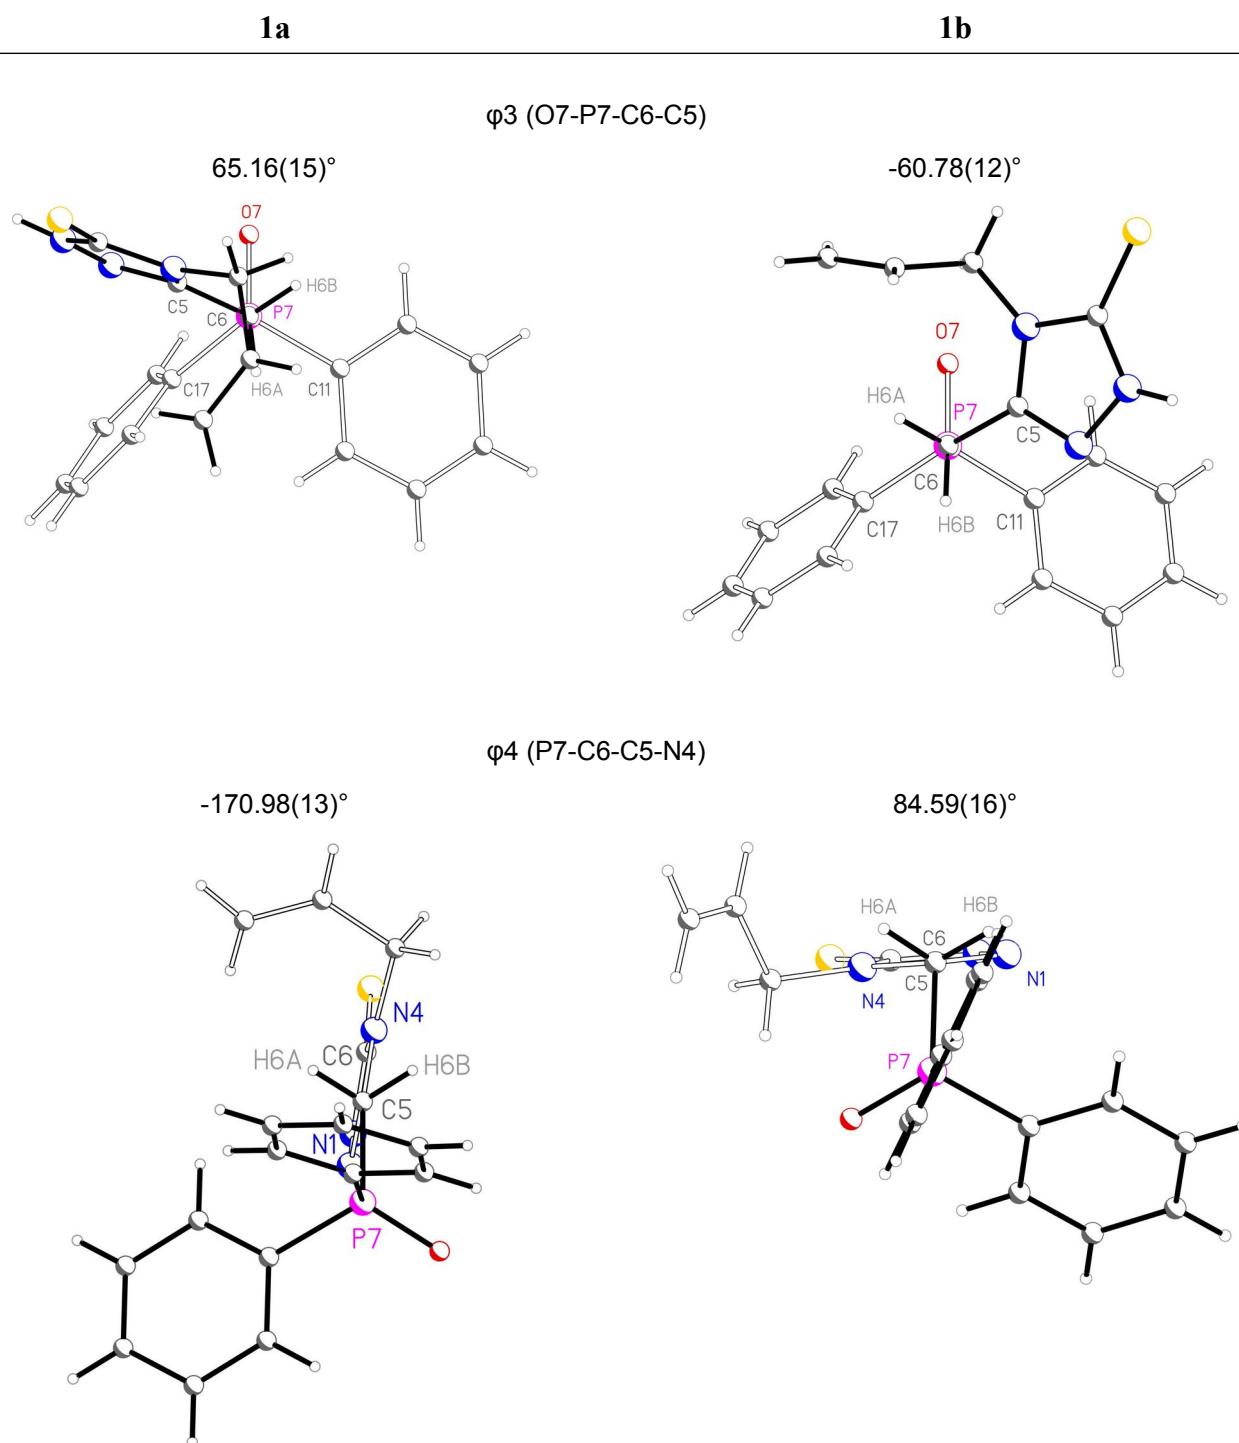

Figure S5. Molecular projections along rotatable bonds. Bonds of molecular fragments connected to the front atom are drawn with solid line and those connected to the back atoms are drawn with open line. The corresponding torsion angles and their values are given above each projection.

**1a****1b** $\phi 5$  (C5-N4-C8-C9) $-84.0(2)^\circ$ 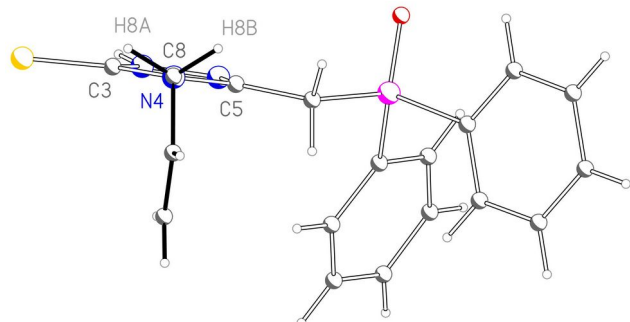 $63.7(2)^\circ$ 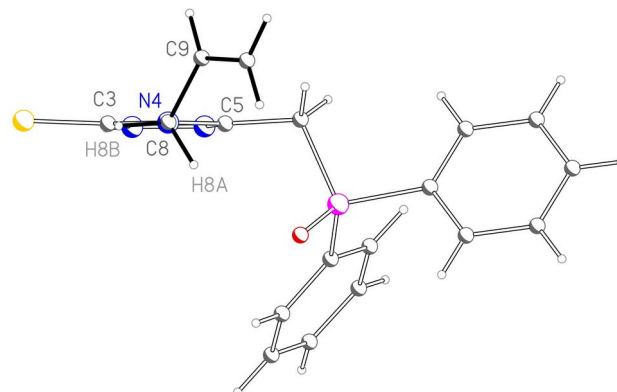 $\phi 6$  (N4-C8-C9-C10) $-8.8(3)^\circ$ 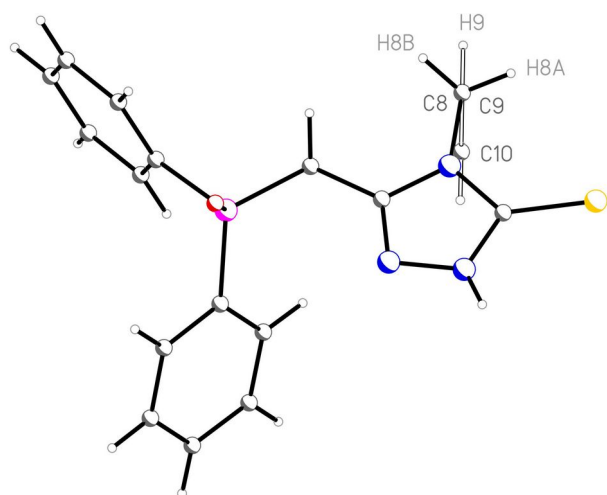 $-134.75(18)^\circ$ 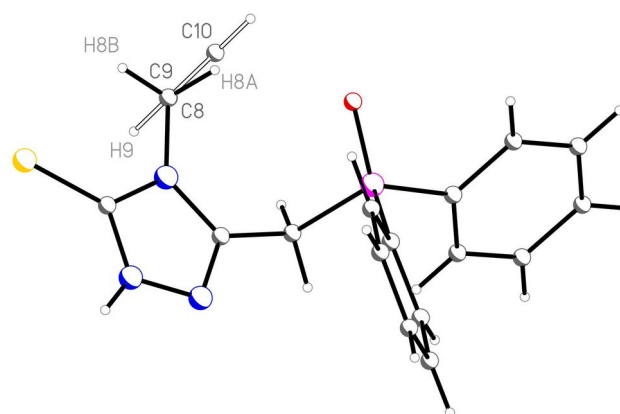

Figure S5 (continued)

## 2.2 Intramolecular bonding interactions

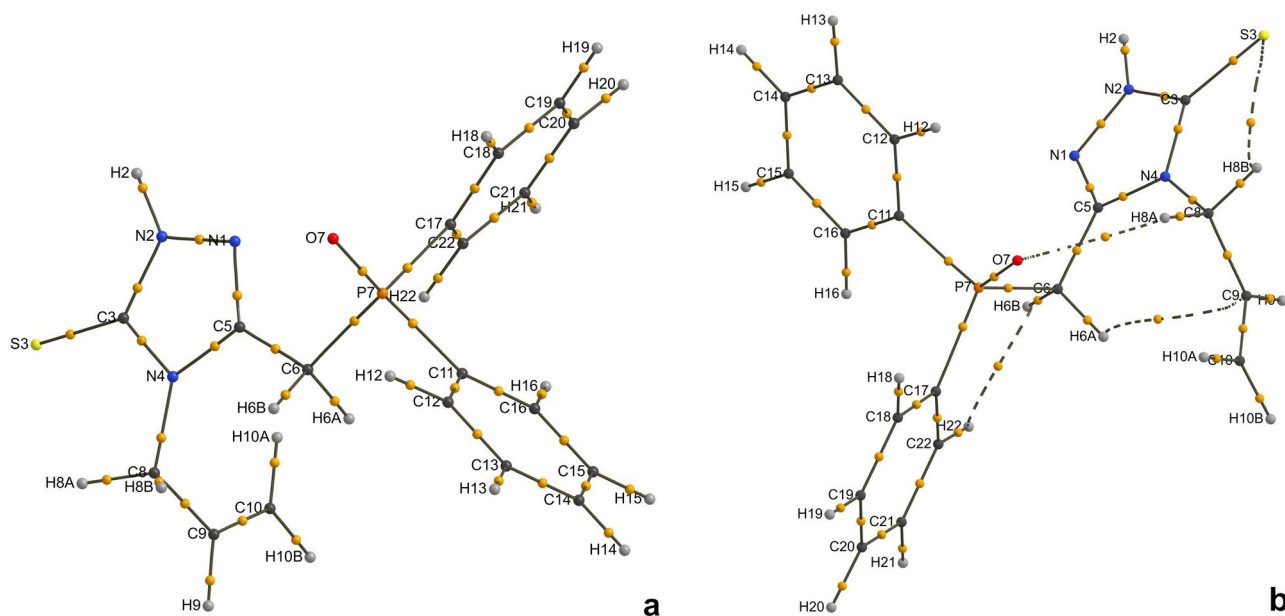

Figure S6. Molecular graphs of the compound 1 in polymorphs **1a** (a) and **1b** (b), based on PBE0-D3/POB-TZVP-rev2 electron density of the optimized crystal structures. Bond critical points are drawn as orange spheres, non-covalent interactions shown with dashed lines.

### 3 DFT calculations (PBE0-D3/POB-TZVP-rev2)

#### 3.1 General information

All calculations were performed with CRYSTAL17 software package version 1.0.2. The combination of PBE0-D3 density functional and POB-TZVP-rev2 basis set was used. The structures of polymorphs were optimized using experimental unit cell parameters.

#### 3.2 Calculated energies

Table S1. Calculated energies (Hartree). All values are given per one molecule (i.e., for crystal structures they are divided by Z).

|                    | Total energy <sup>#1</sup>                                                            | Grimme (D3) dispersion energy part ( $E_{3part}$ ) | BSSE-corrected energy <sup>#2</sup> ( $E_{cp}$ ) |
|--------------------|---------------------------------------------------------------------------------------|----------------------------------------------------|--------------------------------------------------|
|                    | Optimized crystal structures ( $E_{cryst}$ )                                          |                                                    |                                                  |
| <b>1a</b>          | -1674.701837                                                                          | -0.123714                                          |                                                  |
| <b>1b</b>          | -1674.694842                                                                          | -0.117937                                          |                                                  |
|                    | Isolated molecules in crystal geometry ( $E_{mol}$ )                                  |                                                    |                                                  |
| <b>1a</b>          | -1674.579396                                                                          | -0.057210                                          | -1674.548351                                     |
| <b>1b</b>          | -1674.589500                                                                          | -0.057363                                          | -1674.556240                                     |
|                    | Optimized conformer ( $E_{molopt}$ )                                                  |                                                    |                                                  |
| <b>1a</b>          | -1674.586882                                                                          | -0.058954                                          |                                                  |
| <b>1b</b>          | -1674.595937                                                                          | -0.060805                                          |                                                  |
| min. <sup>#3</sup> | -1674.596465                                                                          | -0.058287                                          |                                                  |
|                    | Isolated supramolecular synthon in crystal geometry ( $E_{synthon}$ )                 |                                                    |                                                  |
| <b>1a</b>          | -1674.579347                                                                          | -0.057217                                          |                                                  |
| <b>1b</b>          | -1674.589505                                                                          | -0.057366                                          |                                                  |
|                    | Isolated molecules in crystal geometry ( $E_{mol}$ ) used for synthon BSSE correction |                                                    |                                                  |
|                    | -1674.579396                                                                          | -0.057210                                          | -1674.525308                                     |
|                    | -1674.589500                                                                          | -0.057363                                          | -1674.538433                                     |

Notes:

<sup>#1</sup> Total energy includes -D3 Grimme dispersion energy.

<sup>#2</sup> BSSE-corrected DFT energy is calculated by the counterpoise approach (MOLEBSSE or GHOSTS keywords of CRYSTAL17) and does not include Grimme dispersion energy.

<sup>#3</sup> Energy of the conformer obtained by an exhaustive search of low-energy conformers

Formulas used to calculate energetic characteristics:

$$BSSE = (E_{mol} - E_{mol, d3part}) - E_{cp, crystal}$$

$$E_{latt} = E_{mol} - E_{cryst} - BSSE$$

$$E_{cog} = E_{molopt}(min) - E_{cryst} - BSSE$$

### 3.3 Atomic coordinates of the DFT-optimized structures

#### 1a crystal (CIF format)

```
data_dimer
_symmetry_space_group_name_H-M   'P 21/c'
loop_
_symmetry_equiv_pos_site_id
_symmetry_equiv_pos_as_xyz
1 x,y,z
2 -x,1/2+y,1/2-z
3 -x,-y,-z
4 x,1/2-y,1/2+z
_cell_length_a                   12.9204
_cell_length_b                   9.3989
_cell_length_c                   14.3269
_cell_angle_alpha                90.000
_cell_angle_beta                103.436
_cell_angle_gamma                90.000
_cell_volume                     1692.2
loop_
_atom_site_label
_atom_site_type_symbol
_atom_site_fract_x
_atom_site_fract_y
_atom_site_fract_z
S3 S 0.32126 0.07958 0.07865
P7 P 0.75257 0.4957 0.15264
O7 O 0.69718 0.63953 0.14762
N1 N 0.54076 0.34845 0.04277
N2 N 0.44541 0.27578 0.01407
H2 H 0.3935 0.30046 -0.05102
C3 C 0.42503 0.19151 0.08339
N4 N 0.50972 0.21428 0.16003
C5 C 0.5776 0.30844 0.13111
C6 C 0.67955 0.35228 0.19484
H6B H 0.66631 0.39537 0.26272
H6A H 0.73204 0.25992 0.21443
C8 C 0.52235 0.15598 0.25591
H8B H 0.55096 0.24141 0.3075
H8A H 0.4425 0.12927 0.26445
C9 C 0.59514 0.03064 0.27578
H9 H 0.61549 -0.0016 0.35085
C10 C 0.63432 -0.03894 0.21127
H10A H 0.61565 -0.00904 0.13578
H10B H 0.68552 -0.13076 0.23065
C11 C 0.87683 0.49495 0.24349
C12 C 0.89001 0.59208 0.3187
H12 H 0.82632 0.66602 0.32143
C13 C 0.9828 0.58985 0.39075
H13 H 0.99275 0.66411 0.4501
C14 C 1.06268 0.4924 0.38745
H14 H 1.1354 0.48953 0.44349
C15 C 1.04947 0.39537 0.31246
H15 H 1.11201 0.31919 0.31037
C16 C 0.95658 0.39632 0.24062
H16 H 0.94641 0.32025 0.18221
C17 C 0.78937 0.44707 0.04284
C18 C 0.82906 0.55708 -0.00438
H18 H 0.8267 0.66613 0.02009
C19 C 0.86981 0.52643 -0.08325
H19 H 0.90107 0.61123 -0.11992
C20 C 0.87155 0.38739 -0.11525
H20 H 0.90546 0.36451 -0.17618
C21 C 0.82987 0.27844 -0.06975
H21 H 0.83043 0.16991 -0.09552
C22 C 0.78848 0.30791 0.00933
H22 H 0.75498 0.22205 0.04363
```



## 1b crystal (CIF format)

```
data_chain
_symmetry_space_group_name_H-M   'P 21/c'
loop_
_symmetry_equiv_pos_site_id
_symmetry_equiv_pos_as_xyz
1 x,y,z
2 -x,1/2+y,1/2-z
3 -x,-y,-z
4 x,1/2-y,1/2+z
_cell_length_a                   12.9164
_cell_length_b                   12.6337
_cell_length_c                   12.0704
_cell_angle_alpha                90.000
_cell_angle_beta                116.155
_cell_angle_gamma                90.000
_cell_volume                     1767.99
loop_
_atom_site_label
_atom_site_type_symbol
_atom_site_fract_x
_atom_site_fract_y
_atom_site_fract_z
S3 S 1.29886 0.06553 0.40715
P7 P 0.78592 0.17872 0.2399
O7 O 0.85081 0.27077 0.21868
N1 N 0.98918 -0.03592 0.33331
N2 N 1.09902 -0.04479 0.34152
H2 H 1.12582 -0.11626 0.31937
C3 C 1.16085 0.04423 0.3813
N4 N 1.08618 0.11389 0.39773
C5 C 0.98401 0.06086 0.36811
C6 C 0.88145 0.10344 0.37669
H6A H 0.90601 0.15584 0.45644
H6B H 0.83333 0.03632 0.38749
C8 C 1.11477 0.22407 0.43613
H8A H 1.05846 0.27568 0.36109
H8B H 1.20348 0.23349 0.44813
C9 C 1.10716 0.24908 0.55316
H9 H 1.14785 0.19376 0.62922
C10 C 1.05649 0.33568 0.56738
H10A H 1.0149 0.39148 0.49197
H10B H 1.05604 0.3546 0.65469
C11 C 0.73567 0.08737 0.11189
C12 C 0.78012 0.09845 0.02628
H12 H 0.83761 0.16391 0.03561
C13 C 0.74972 0.02666 -0.06971
H13 H 0.78255 0.03497 -0.13791
C14 C 0.67489 -0.05571 -0.0805
H14 H 0.6518 -0.11167 -0.15573
C15 C 0.62878 -0.06576 0.00339
H15 H 0.56793 -0.12885 -0.00768
C16 C 0.65888 0.00577 0.09989
H16 H 0.62054 -0.00086 0.16357
C17 C 0.66563 0.21742 0.26889
C18 C 0.60196 0.3052 0.20474
H18 H 0.62942 0.35088 0.14622
C19 C 0.50558 0.33607 0.21904
H19 H 0.4553 0.40327 0.16708
C20 C 0.47337 0.28019 0.29796
H20 H 0.39673 0.30243 0.30774
C21 C 0.53833 0.19439 0.36414
H21 H 0.51352 0.15125 0.42625
C22 C 0.63425 0.16233 0.34965
H22 H 0.68294 0.09489 0.40281
```

# 1a isolated conformer (XYZ format)

42

|   |          |          |          |
|---|----------|----------|----------|
| P | 2.82429  | -4.84541 | 2.30634  |
| O | 2.33531  | -6.25591 | 2.11948  |
| C | 3.50500  | -4.07138 | 0.81994  |
| C | 4.09220  | -4.73393 | 3.60492  |
| C | 1.56011  | -3.65650 | 2.93098  |
| C | 3.64866  | -2.69332 | 0.68178  |
| C | 3.88310  | -4.91943 | -0.21372 |
| C | 4.17085  | -5.80672 | 4.48639  |
| C | 4.94834  | -3.64647 | 3.75068  |
| H | 2.07631  | -2.76909 | 3.31534  |
| H | 1.10232  | -4.15548 | 3.79416  |
| C | 0.53424  | -3.25116 | 1.94723  |
| H | 3.32800  | -2.02046 | 1.47094  |
| C | 4.18186  | -2.16858 | -0.48318 |
| H | 3.73296  | -5.98734 | -0.09608 |
| C | 4.41797  | -4.38878 | -1.37656 |
| H | 3.51137  | -6.65483 | 4.33405  |
| C | 5.09271  | -5.78215 | 5.52103  |
| H | 4.91562  | -2.82353 | 3.04375  |
| C | 5.86907  | -3.62838 | 4.78480  |
| N | 0.26697  | -3.85250 | 0.82741  |
| N | -0.27077 | -2.14640 | 2.13045  |
| H | 4.28724  | -1.09471 | -0.59343 |
| C | 4.56930  | -3.01696 | -1.51036 |
| H | 4.71032  | -5.04864 | -2.18600 |
| H | 5.15593  | -6.61885 | 6.20829  |
| C | 5.93768  | -4.69344 | 5.67179  |
| H | 6.54208  | -2.78506 | 4.89472  |
| N | -0.75307 | -3.08645 | 0.28175  |
| C | -1.11416 | -2.02735 | 1.04103  |
| C | -0.23737 | -1.21638 | 3.23464  |
| H | 4.98400  | -2.60511 | -2.42399 |
| H | 6.66173  | -4.67767 | 6.47929  |
| H | -1.15951 | -3.33613 | -0.60440 |
| S | -2.27493 | -0.86295 | 0.75629  |
| H | -0.18542 | -1.78080 | 4.17146  |
| H | -1.20255 | -0.69415 | 3.21254  |
| C | 0.88256  | -0.22788 | 3.14966  |
| H | 1.04318  | 0.35116  | 4.05671  |
| C | 1.62120  | -0.00220 | 2.07546  |
| H | 2.39746  | 0.75445  | 2.07767  |
| H | 1.45971  | -0.54283 | 1.14773  |

**1b isolated conformer (XYZ format)**

42

|   |          |          |          |
|---|----------|----------|----------|
| S | 2.59125  | -6.07275 | 2.08676  |
| C | 4.22650  | -6.09406 | 1.74590  |
| N | 5.06518  | -7.15234 | 1.69748  |
| N | 5.06236  | -5.03311 | 1.44855  |
| H | 4.80382  | -8.10918 | 1.86503  |
| N | 6.37784  | -6.81835 | 1.39722  |
| C | 6.33255  | -5.52469 | 1.25547  |
| C | 4.61569  | -3.64667 | 1.34288  |
| C | 7.53111  | -4.69467 | 1.03620  |
| H | 5.20993  | -3.02612 | 2.01854  |
| H | 3.57377  | -3.67185 | 1.68153  |
| C | 4.71853  | -3.13815 | -0.05710 |
| H | 8.34161  | -5.35246 | 0.71791  |
| H | 7.36413  | -3.92803 | 0.27382  |
| P | 8.02291  | -3.78792 | 2.57725  |
| H | 4.15420  | -3.68458 | -0.81054 |
| C | 5.43498  | -2.07195 | -0.37931 |
| O | 7.27472  | -2.48446 | 2.74423  |
| C | 9.81485  | -3.56326 | 2.44826  |
| C | 7.67609  | -4.97524 | 3.90059  |
| H | 5.47403  | -1.69906 | -1.39732 |
| H | 6.00218  | -1.53521 | 0.37752  |
| C | 10.30676 | -2.32706 | 2.85514  |
| C | 10.68931 | -4.54178 | 1.98058  |
| C | 6.41877  | -4.88988 | 4.49435  |
| C | 8.54936  | -5.99510 | 4.26140  |
| H | 9.60436  | -1.57384 | 3.19678  |
| C | 11.66830 | -2.07663 | 2.80478  |
| H | 10.31772 | -5.50642 | 1.64900  |
| C | 12.04973 | -4.28608 | 1.93459  |
| H | 5.75806  | -4.07174 | 4.22925  |
| C | 6.02756  | -5.84145 | 5.42097  |
| H | 9.53958  | -6.05093 | 3.82279  |
| C | 8.15723  | -6.93640 | 5.19862  |
| H | 12.05160 | -1.11243 | 3.12010  |
| C | 12.53817 | -3.05511 | 2.34801  |
| H | 12.73042 | -5.04771 | 1.57064  |
| H | 5.04311  | -5.78094 | 5.87109  |
| C | 6.89490  | -6.86621 | 5.76884  |
| H | 8.83973  | -7.72934 | 5.48414  |
| H | 13.60371 | -2.85678 | 2.30799  |
| H | 6.58827  | -7.61101 | 6.49527  |

### 3.4 Lowest energy conformer found by an exhaustive search

#### Coordinates (XYZ format)

42

|     |          |          |          |
|-----|----------|----------|----------|
| P1  | -0.04690 | 0.14820  | 0.22280  |
| O2  | -0.76040 | -1.17650 | 0.37590  |
| S2  | -5.91990 | 1.49590  | -0.60100 |
| C3  | 0.24710  | 0.61220  | -1.49850 |
| C4  | 1.55240  | 0.15520  | 1.07480  |
| C5  | -0.93200 | 1.57030  | 0.99490  |
| H6  | -1.11890 | 1.26200  | 2.02880  |
| C8  | 0.44070  | 1.92690  | -1.91500 |
| H9  | 0.36040  | 2.75030  | -1.21420 |
| C10 | 0.54830  | -0.15270 | -3.75570 |
| H11 | 0.58040  | -0.96140 | -4.47750 |
| C12 | 0.29160  | -0.42740 | -2.42310 |
| H13 | 0.10790  | -1.44110 | -2.08320 |
| C14 | 0.69780  | 2.19380  | -3.24960 |
| H15 | 0.84100  | 3.21780  | -3.57590 |
| C16 | 0.75620  | 1.15550  | -4.16700 |
| H17 | 0.95450  | 1.36910  | -5.21180 |
| C18 | 1.82560  | -0.92330 | 1.90830  |
| H19 | 1.09170  | -1.71820 | 1.98960  |
| C20 | 3.67720  | 1.13030  | 1.62060  |
| H21 | 4.40520  | 1.92580  | 1.50420  |
| C22 | 3.02600  | -0.96920 | 2.60000  |
| H23 | 3.24420  | -1.81120 | 3.24790  |
| C24 | 3.94740  | 0.05680  | 2.45880  |
| H25 | 4.88690  | 0.01850  | 2.99940  |
| C26 | 2.48170  | 1.18060  | 0.92510  |
| H27 | 2.28350  | 2.00780  | 0.24990  |
| H28 | -0.26630 | 2.43620  | 1.01080  |
| C29 | -3.61190 | 0.00100  | 1.12560  |
| H30 | -2.86600 | -0.74120 | 0.83200  |
| H31 | -4.60570 | -0.31780 | 0.79270  |
| C32 | -3.59000 | 0.23340  | 2.60060  |
| H33 | -4.29810 | 0.96730  | 2.98130  |
| C34 | -2.77750 | -0.41730 | 3.42040  |
| H35 | -2.07010 | -1.14760 | 3.03540  |
| H36 | -2.79840 | -0.25400 | 4.49260  |
| C37 | -2.18940 | 1.95270  | 0.32470  |
| N38 | -3.35990 | 1.23490  | 0.38560  |
| N39 | -2.31590 | 3.02580  | -0.40420 |
| N40 | -3.63820 | 2.97390  | -0.82090 |
| C41 | -4.31950 | 1.90230  | -0.35430 |
| H42 | -4.02290 | 3.69720  | -1.40530 |

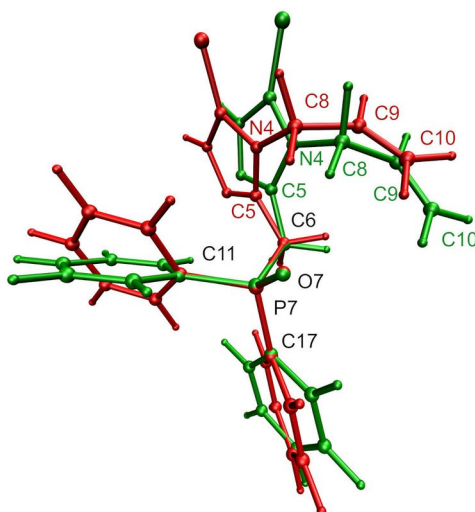

Figure S7. Overlay of the lowest-energy conformer generated by the exhaustive search (green) and the conformer taken from the polymorph **1b** (red). Coordinates of both conformers are taken from PBE0-D3/POB-TZVP-rev2 geometry optimization. The atom P7 and four connected atoms are superimposed.

## 4 Bonding interactions

### 4.1 Intermolecular bonding interactions

**Table S2. Intermolecular bonding interactions in 1a (based on PBE0-D3/POB-TZVP-rev2 data)**

| N  | A1   | A2   | $r(\text{A1-A2}), \text{exp}$<br>Å | $r(\text{A1-A2}), \text{DFT}$<br>Å | $\rho(\mathbf{r})$<br>e Å <sup>-3</sup> | $\nabla^2\rho(\mathbf{r})$<br>e Å <sup>-5</sup> | $\epsilon$ | $E_{\text{EML}}$<br>kcal/mol |
|----|------|------|------------------------------------|------------------------------------|-----------------------------------------|-------------------------------------------------|------------|------------------------------|
| 1  | O7   | H2   | 1.727                              | 1.689                              | 0.307                                   | 3.33                                            | 0.01       | 15.15                        |
| 2  | S3   | H12  | 2.855                              | 2.759                              | 0.075                                   | 0.77                                            | 0.09       | 1.65                         |
| 3  | H8A  | O7   | 2.454                              | 2.431                              | 0.065                                   | 0.87                                            | 0.05       | 1.56                         |
| 4  | H10B | O7   | 2.441                              | 2.486                              | 0.056                                   | 0.79                                            | 0.06       | 1.44                         |
| 5  | H16  | C13  | 2.635                              | 2.658                              | 0.052                                   | 0.52                                            | 0.29       | 1.13                         |
| 6  | C21  | H13  | 2.785                              | 2.742                              | 0.047                                   | 0.48                                            | 0.52       | 1.10                         |
| 7  | N1   | N1   | 3.230                              | 3.182                              | 0.044                                   | 0.57                                            | 0.07       | 1.08                         |
| 8  | C16  | H19  | 2.854                              | 2.803                              | 0.043                                   | 0.48                                            | 1.12       | 1.04                         |
| 9  | S3   | H6B  | 3.009                              | 2.832                              | 0.059                                   | 0.56                                            | 0.08       | 0.99                         |
| 10 | H13  | C14  | 3.028                              | 2.978                              | 0.039                                   | 0.42                                            | 0.64       | 0.99                         |
| 11 | S3   | H14  | 2.815                              | 2.789                              | 0.055                                   | 0.59                                            | 0.09       | 0.98                         |
| 12 | H15  | C12  | 2.847                              | 2.820                              | 0.040                                   | 0.42                                            | 0.31       | 0.93                         |
| 13 | H12  | H19  | 2.368                              | 2.376                              | 0.038                                   | 0.44                                            | 0.42       | 0.87                         |
| 14 | H20  | C16  | 2.860                              | 2.869                              | 0.038                                   | 0.38                                            | 0.55       | 0.85                         |
| 15 | C9   | N4   | 3.485                              | 3.479                              | 0.033                                   | 0.44                                            | 0.52       | 0.83                         |
| 16 | C6   | C21  | 3.653                              | 3.689                              | 0.031                                   | 0.37                                            | 8.11       | 0.79                         |
| 17 | C11  | H21  | 2.930                              | 2.954                              | 0.036                                   | 0.39                                            | 1.57       | 0.78                         |
| 18 | H22  | H14  | 2.514                              | 2.587                              | 0.030                                   | 0.36                                            | 0.43       | 0.76                         |
| 19 | H19  | H13  | 2.468                              | 2.513                              | 0.031                                   | 0.39                                            | 2.16       | 0.75                         |
| 20 | C9   | C20  | 3.665                              | 3.632                              | 0.031                                   | 0.35                                            | 0.12       | 0.74                         |
| 21 | C10  | H8B  | 3.224                              | 3.125                              | 0.030                                   | 0.33                                            | 0.22       | 0.70                         |
| 22 | H20  | C16  | 3.168                              | 3.138                              | 0.028                                   | 0.33                                            | 0.53       | 0.68                         |
| 23 | H18  | S3   | 3.205                              | 3.180                              | 0.034                                   | 0.31                                            | 0.11       | 0.64                         |
| 24 | H21  | S3   | 3.115                              | 3.101                              | 0.028                                   | 0.32                                            | 0.06       | 0.60                         |
| 25 | C19  | C19  | 3.725                              | 3.678                              | 0.024                                   | 0.28                                            | 3.91       | 0.54                         |
| 26 | O7   | H15  | 3.040                              | 2.933                              | 0.024                                   | 0.28                                            | 0.15       | 0.48                         |
| 27 | H22  | S3   | 3.303                              | 3.358                              | 0.022                                   | 0.22                                            | 0.20       | 0.45                         |
| 28 | S3   | H10A | 3.272                              | 3.421                              | 0.021                                   | 0.18                                            | 0.05       | 0.36                         |
| 29 | H10A | N2   | 3.209                              | 3.275                              | 0.015                                   | 0.23                                            | 1.73       | 0.34                         |
| 30 | H18  | H15  | 2.766                              | 2.775                              | 0.016                                   | 0.19                                            | 0.50       | 0.33                         |
| 31 | H10B | H15  | 2.828                              | 2.850                              | 0.013                                   | 0.17                                            | 0.77       | 0.27                         |
| 32 | N1   | H9   | 3.160                              | 3.435                              | 0.011                                   | 0.13                                            | 0.07       | 0.20                         |
| 33 | N1   | H8B  | 3.497                              | 3.507                              | 0.009                                   | 0.13                                            | 0.58       | 0.19                         |

Note: Experimental N-H distances set to 1.085 Å for aromatic carbon atoms and 1.095 Å for other atoms; N-H set to 1.040 Å

**Table S3. Intermolecular bonding interactions in 1b (based on PBE0-D3/POB-TZVP-rev2 data)**

| N  | A1   | A2   | $r(\text{A1-A2})$ , exp<br>Å | $r(\text{A1-A2})$ , DFT<br>Å | $\rho(r)$<br>e Å <sup>-3</sup> | $\nabla^2\rho(r)$<br>e Å <sup>-5</sup> | $\varepsilon$ | $E_{\text{EML}}$<br>kcal/mol |
|----|------|------|------------------------------|------------------------------|--------------------------------|----------------------------------------|---------------|------------------------------|
| 1  | H2   | O7   | 1.634                        | 1.569                        | 0.393                          | 4.09                                   | 0.01          | 20.99                        |
| 2  | H6A  | N1   | 2.723                        | 2.746                        | 0.050                          | 0.70                                   | 0.37          | 1.47                         |
| 3  | C10  | H12  | 2.722                        | 2.680                        | 0.049                          | 0.54                                   | 0.30          | 1.21                         |
| 4  | C13  | C18  | 3.336                        | 3.314                        | 0.043                          | 0.45                                   | 0.96          | 1.09                         |
| 5  | H19  | S3   | 3.020                        | 2.914                        | 0.052                          | 0.50                                   | 0.18          | 1.00                         |
| 6  | C20  | H14  | 2.680                        | 2.765                        | 0.047                          | 0.47                                   | 0.80          | 0.99                         |
| 7  | H20  | H15  | 2.420                        | 2.411                        | 0.040                          | 0.46                                   | 0.41          | 0.97                         |
| 8  | C16  | C15  | 3.639                        | 3.442                        | 0.037                          | 0.41                                   | 0.09          | 0.95                         |
| 9  | N1   | H9   | 2.881                        | 2.832                        | 0.041                          | 0.47                                   | 0.23          | 0.93                         |
| 10 | H21  | S3   | 2.788                        | 2.890                        | 0.040                          | 0.46                                   | 0.09          | 0.84                         |
| 11 | H16  | H20  | 2.613                        | 2.533                        | 0.033                          | 0.40                                   | 1.26          | 0.84                         |
| 12 | C13  | C10  | 3.561                        | 3.468                        | 0.033                          | 0.36                                   | 1.35          | 0.83                         |
| 13 | S3   | H22  | 2.982                        | 2.992                        | 0.045                          | 0.43                                   | 0.09          | 0.80                         |
| 14 | H21  | H18  | 2.361                        | 2.406                        | 0.036                          | 0.40                                   | 0.04          | 0.79                         |
| 15 | H10B | C3   | 2.728                        | 2.772                        | 0.037                          | 0.45                                   | 2.16          | 0.79                         |
| 16 | H18  | S3   | 3.255                        | 3.025                        | 0.043                          | 0.38                                   | 0.09          | 0.72                         |
| 17 | H13  | S3   | 3.240                        | 3.204                        | 0.031                          | 0.29                                   | 0.02          | 0.58                         |
| 18 | C14  | H8B  | 3.109                        | 3.147                        | 0.024                          | 0.27                                   | 1.17          | 0.56                         |
| 19 | H14  | S3   | 3.262                        | 3.415                        | 0.021                          | 0.21                                   | 0.63          | 0.43                         |
| 20 | C18  | H15  | 3.181                        | 3.292                        | 0.017                          | 0.19                                   | 1.24          | 0.33                         |
| 21 | H10A | H10A | 2.850                        | 2.787                        | 0.014                          | 0.16                                   | 0.09          | 0.28                         |
| 22 | H8A  | N1   | 3.173                        | 3.206                        | 0.014                          | 0.17                                   | 0.42          | 0.25                         |
| 23 | H20  | H9   | 2.959                        | 2.979                        | 0.010                          | 0.13                                   | 0.22          | 0.21                         |

Note: Experimental N-H distances set to 1.085 Å for aromatic carbon atoms and 1.095 Å for other atoms; N-H set to 1.043 Å

## 4.2 Connectivity graphs of H-bonded synthons

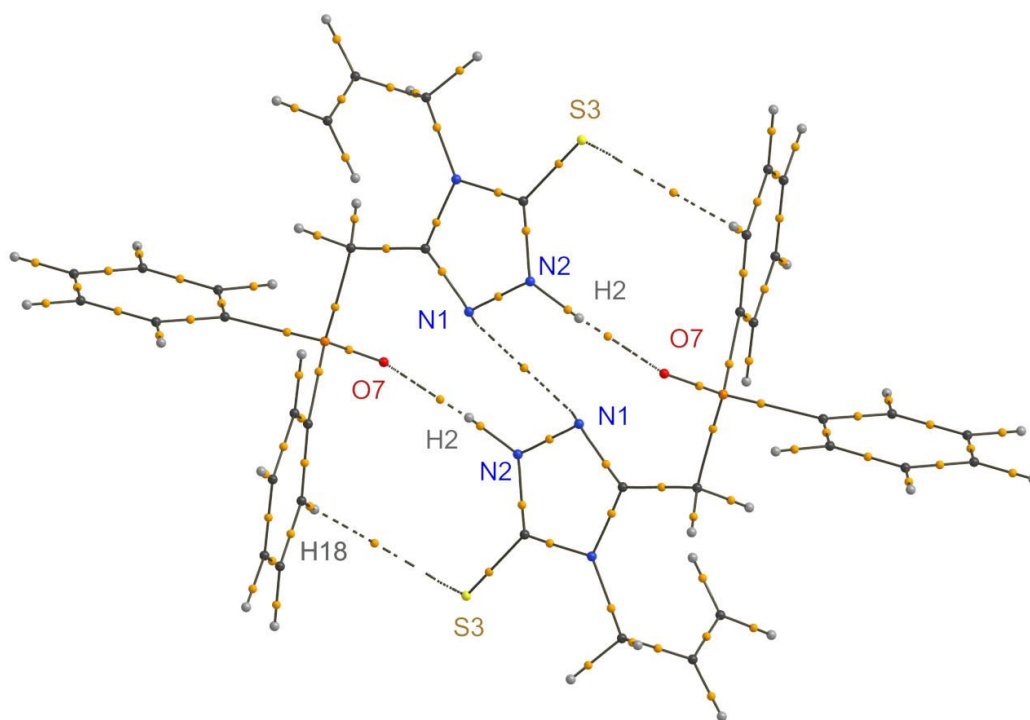

Figure S8. Connectivity graph of the H-bonded dimer in the polymorph **1a**, calculated from  $\rho(\mathbf{r})$  distribution of the optimized crystal structure at PBE0-D3/POB-TZVP-rev2 level. Non-covalent bonded interactions are drawn with dashed lines; only atoms participating in intermolecular bonding interactions are labeled.

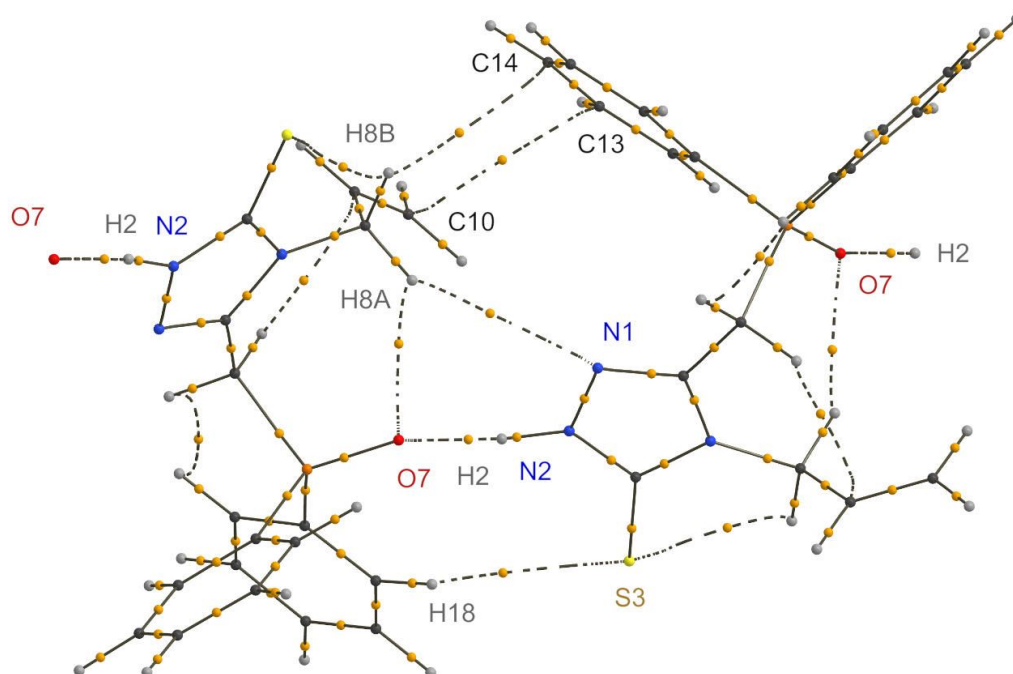

Figure S9. Connectivity graph of the H-bonded chain in the polymorph **1b**, calculated from  $\rho(\mathbf{r})$  distribution of the optimized crystal structure at PBE0-D3/POB-TZVP-rev2 level. Only two molecules and atoms O7 and H2 extending the chain are shown. Non-covalent bonded interactions are drawn with dashed lines; only atoms participating in intermolecular bonding interactions are labeled.

## 5 Hirshfeld fingerprint plots

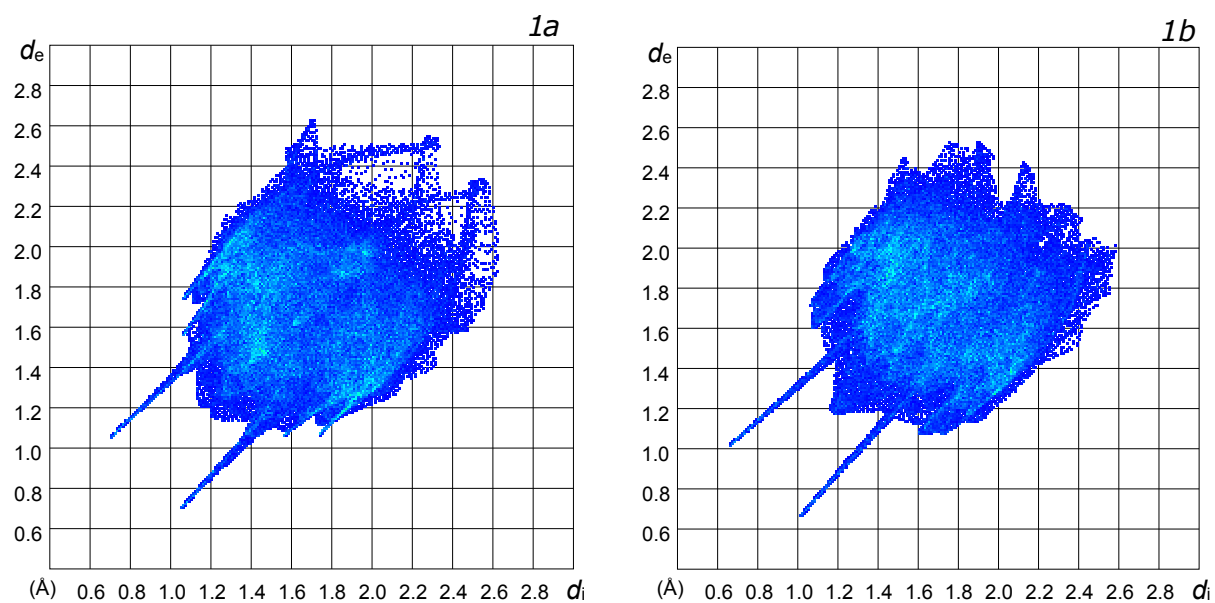

Figure S10. Fingerprint plots for polymorphs **1a** and **1b**.
